# Supplementary material
Source: ML conference proceedings conference paper supplement (https://aclanthology.org/D17-1238)
Supplement: Attachment [file 387_suppl_cameraReady.pdf › 387_suppl_cameraReady.pdf]

## Appendix A: Detailed Results

| BAGEL                 |             |            | SFHOTEL              |             |            | SFREST              |             |            |
|-----------------------|-------------|------------|----------------------|-------------|------------|---------------------|-------------|------------|
| Inf: 0.16*            | Nat: 0.36*  | Qua: 0.38* | Inf: 0.41*           | Nat: 0.47*  | Qua: 0.52* | Inf: 0.35*          | Nat: 0.29*  | Qua: 0.35* |
| TGEN: 0.42*           | LOLS: 0.24* |            | RNNLG: 0.52*         | LOLS: 0.45* |            | RNNLG: 0.28*        | LOLS: 0.38* |            |
| Total BAGEL: 0.31*    |             |            | Total SFHOTEL: 0.50* |             |            | Total SFREST: 0.35* |             |            |
| Total all data: 0.45* |             |            |                      |             |            |                     |             |            |

Table 7: Intra-class correlation coefficient (ICC) for human ratings across the three datasets. “\*” denotes statistical significance ( $p < 0.05$ ).

| metric          | BAGEL        |              | SFHOTEL      |               | SFREST       |              |
|-----------------|--------------|--------------|--------------|---------------|--------------|--------------|
|                 | TGEN         | LOLS         | RNNLG        | LOLS          | RNNLG        | LOLS         |
|                 | Avg / StDev  | Avg / StDev  | Avg / StDev  | Avg / StDev   | Avg / StDev  | Avg / StDev  |
| TER             | 0.36/0.24    | 0.33/0.24    | 0.28*/0.27   | 0.65*/0.32    | 0.41*/0.35   | 0.65*/0.27   |
| BLEU1           | 0.75*/0.21   | 0.81*/0.16   | 0.85*/0.18   | 0.66*/0.23    | 0.73*/0.24   | 0.59*/0.23   |
| BLEU2           | 0.68/0.23    | 0.72/0.21    | 0.78*/0.25   | 0.54*/0.28    | 0.62*/0.31   | 0.45*/0.29   |
| BLEU3           | 0.60/0.28    | 0.63/0.26    | 0.69*/0.32   | 0.42*/0.33    | 0.52*/0.37   | 0.34*/0.33   |
| BLEU4           | 0.52/0.32    | 0.53/0.33    | 0.56*/0.40   | 0.28*/0.33    | 0.44*/0.41   | 0.24*/0.32   |
| ROUGE           | 0.76/0.18    | 0.78/0.17    | 0.83*/0.18   | 0.64*/0.21    | 0.72*/0.24   | 0.58*/0.22   |
| NIST            | 4.44*/2.05   | 4.91*/2.04   | 4.37*/2.19   | 3.49*/1.99    | 4.86*/2.55   | 4.01*/2.07   |
| LEPOR           | 0.46*/0.22   | 0.50*/0.19   | 0.52*/0.23   | 0.30*/0.16    | 0.51*/0.25   | 0.30*/0.17   |
| CIDEr           | 2.92/2.40    | 3.01/2.27    | 3.08*/2.05   | 1.66*/1.67    | 3.39*/2.53   | 2.09*/1.73   |
| METEOR          | 0.50/0.22    | 0.53/0.23    | 0.62*/0.27   | 0.44*/0.20    | 0.54*/0.28   | 0.41*/0.19   |
| SIM             | 0.66/0.09    | 0.65/0.12    | 0.76*/0.15   | 0.73*/0.14    | 0.76/0.13    | 0.77/0.14    |
| RE              | 86.79/19.48  | 83.39/20.41  | 70.90/17.07  | 69.62/19.14   | 64.67/19.07  | 64.27/22.22  |
| msp             | 0.04*/0.21   | 0.14*/0.37   | 0.68/0.78    | 0.69/0.77     | 0.78/0.82    | 0.85/0.89    |
| prs             | 84.51*/25.78 | 93.30*/27.04 | 97.58*/32.58 | 107.90*/36.41 | 93.74/34.98  | 97.20/39.30  |
| len             | 38.20*/14.22 | 42.54*/14.11 | 49.06*/15.77 | 51.69*/17.30  | 53.27*/19.50 | 50.92*/18.74 |
| wps             | 10.08*/3.10  | 10.94*/3.19  | 11.43*/3.63  | 12.07*/4.17   | 11.15*/4.37  | 10.52*/4.21  |
| sps             | 13.15*/4.98  | 14.61*/5.13  | 16.03*/4.88  | 17.02*/5.90   | 16.39*/6.17  | 15.41*/5.92  |
| cpw             | 3.77/0.60    | 3.88/0.59    | 4.34/0.58    | 4.36/0.63     | 4.86*/0.64   | 4.94*/0.76   |
| spw             | 1.30/0.22    | 1.33/0.23    | 1.43/0.23    | 1.43/0.26     | 1.50/0.26    | 1.50/0.29    |
| pol             | 2.22/1.21    | 2.40/1.16    | 1.24/1.04    | 1.33/1.04     | 1.69/1.12    | 1.57/1.07    |
| ppw             | 0.22/0.09    | 0.22/0.09    | 0.11/0.10    | 0.12/0.09     | 0.16/0.11    | 0.16/0.12    |
| informativeness | 4.77/1.09    | 4.91/1.23    | 5.47*/0.81   | 5.27/1.02     | 5.29*/0.94   | 5.16/1.07    |
| naturalness     | 4.76/1.26    | 4.67/1.25    | 4.99*/1.13   | 4.62/1.28     | 4.86/1.13    | 4.74/1.23    |
| quality         | 4.77/1.19    | 4.54/1.28    | 4.54/1.18    | 4.53/1.26     | 4.51/1.14    | 4.58/1.33    |

Table 8: The systems’ performance for all datasets. Avg denotes a mean value, StDev stands for standard deviation, “\*” denotes a statistically significant difference ( $p < 0.05$ ) between the two systems on the given dataset.

| metric | BAGEL         |              |               |              | SFHOTEL       |               |       |        | SFRST         |              |              |        |
|--------|---------------|--------------|---------------|--------------|---------------|---------------|-------|--------|---------------|--------------|--------------|--------|
|        | TGEN          |              | LOLS          |              | RNNLG         |               | LOLS  |        | RNNLG         |              | LOLS         |        |
|        | inf           | nat          | qual          | inf          | nat           | qual          | inf   | nat    | qual          | inf          | nat          | qual   |
| TER    | -0.21*        | -0.19*       | -0.16*        | -0.16*       | -0.19*        | -0.16*        | -0.03 | -0.09  | -0.08         | -0.06        | -0.20*       | -0.12* |
| BLEU1  | <b>0.30*</b>  | 0.15*        | 0.13          | 0.13         | 0.15*         | 0.13          | 0.09  | 0.09*  | 0.08          | 0.01         | 0.12*        | 0.06   |
| BLEU2  | <b>0.30*</b>  | 0.17*        | 0.14          | 0.12         | 0.14*         | 0.11          | 0.08  | 0.09*  | 0.07          | 0.00         | 0.12*        | 0.07   |
| BLEU3  | <b>0.27*</b>  | 0.17*        | 0.12          | 0.11         | 0.13          | 0.10          | 0.06  | 0.08   | 0.06          | 0.01         | 0.11*        | 0.08   |
| BLEU4  | <b>0.23*</b>  | 0.15*        | 0.11          | 0.11         | 0.13          | 0.10          | 0.06  | 0.05   | 0.07          | 0.00         | 0.02         | 0.03   |
| ROUGE  | 0.20*         | 0.11         | 0.09          | 0.20*        | 0.17*         | 0.15*         | 0.07  | 0.09   | 0.08          | -0.01        | 0.04         | 0.02   |
| NIST   | 0.24*         | 0.07         | 0.02          | 0.16*        | 0.13          | 0.11          | 0.07  | 0.05   | 0.01          | 0.02         | 0.14*        | 0.11*  |
| LEPOR  | <b>0.17*</b>  | 0.12         | <b>0.07</b>   | -0.07        | 0.02          | -0.04         | 0.03  | 0.03   | 0.03          | 0.14*        | <b>0.17*</b> | 0.10*  |
| CIDE1  | <b>0.26*</b>  | 0.14*        | 0.10          | 0.14*        | 0.19*         | 0.14*         | 0.07  | 0.07   | 0.00          | 0.03         | 0.13*        | 0.09   |
| METEOR | 0.29*         | 0.09         | 0.09          | 0.20*        | 0.18*         | 0.16*         | 0.07  | 0.10*  | 0.10*         | 0.05         | 0.06         | 0.04   |
| SIM    | 0.16*         | 0.04         | 0.06          | 0.14*        | 0.13          | 0.09          | -0.05 | -0.12* | -0.11*        | 0.03         | -0.03        | -0.08  |
| RE     | -0.06         | <b>0.09</b>  | 0.13          | -0.09        | -0.04         | 0.04          | 0.00  | 0.03   | 0.10*         | -0.01        | 0.03         | 0.09   |
| cpw    | 0.03          | <b>-0.12</b> | <b>-0.19*</b> | 0.08         | 0.05          | -0.03         | 0.02  | -0.02  | <b>-0.09*</b> | <b>0.13*</b> | <b>0.14*</b> | 0.06   |
| len    | <b>0.25*</b>  | -0.25*       | -0.21*        | 0.04         | -0.19*        | -0.24*        | 0.01  | -0.17* | -0.09         | 0.12*        | -0.08        | -0.07  |
| wps    | <b>0.33*</b>  | -0.17*       | -0.12         | -0.05        | <b>-0.28*</b> | <b>-0.29*</b> | 0.01  | -0.15* | -0.05         | 0.08         | -0.12*       | -0.08  |
| sps    | <b>0.25*</b>  | -0.20*       | -0.17*        | 0.03         | -0.17*        | -0.23*        | -0.02 | -0.16* | -0.08         | 0.02         | -0.18*       | -0.16* |
| spw    | 0.01          | -0.07        | <b>-0.13</b>  | 0.10         | <b>0.09</b>   | 0.02          | -0.08 | -0.02  | -0.11*        | -0.10*       | -0.10*       | -0.17* |
| pol    | 0.16*         | -0.06        | -0.07         | 0.11         | -0.03         | -0.12         | -0.07 | -0.10* | -0.15*        | 0.01         | -0.09        | -0.14* |
| ppw    | -0.02         | 0.06         | 0.00          | <b>0.16*</b> | 0.15*         | 0.08          | -0.09 | -0.06  | -0.16*        | -0.02        | -0.01        | -0.09  |
| mnp    | -0.02         | -0.06        | -0.11         | 0.02         | -0.02         | -0.10         | -0.01 | -0.10* | -0.08         | 0.05         | -0.02        | -0.03  |
| prs    | <b>-0.23*</b> | 0.18*        | 0.13          | 0.05         | 0.24*         | 0.31*         | -0.02 | 0.13*  | 0.09          | -0.13*       | 0.05         | 0.04   |

Table 9: Spearman correlation between metrics and human ratings for individual datasets and systems. “\*” denotes statistically significant correlation ( $p < 0.05$ ), bold font denotes significantly stronger correlation when comparing two systems on the same dataset.

|        | BAGEL      |            |             | SFHOTEL    |            |             | SFREST     |            |             |
|--------|------------|------------|-------------|------------|------------|-------------|------------|------------|-------------|
|        | <i>inf</i> | <i>nat</i> | <i>qual</i> | <i>inf</i> | <i>nat</i> | <i>qual</i> | <i>inf</i> | <i>nat</i> | <i>qual</i> |
| TER    | -0.19*     | -0.19*     | -0.15*      | -0.10*     | -0.19*     | -0.07*      | -0.09*     | -0.15*     | -0.08*      |
| BLEU1  | 0.23*      | 0.14*      | 0.11*       | 0.11*      | 0.18*      | 0.07*       | 0.11*      | 0.14*      | 0.07*       |
| BLEU2  | 0.21*      | 0.15*      | 0.12*       | 0.10*      | 0.17*      | 0.07*       | 0.09*      | 0.13*      | 0.06*       |
| BLEU3  | 0.19*      | 0.15*      | 0.11*       | 0.09*      | 0.16*      | 0.07*       | 0.08*      | 0.12*      | 0.06*       |
| BLEU4  | 0.18*      | 0.14*      | 0.10*       | 0.08*      | 0.10*      | 0.06        | 0.09*      | 0.09*      | 0.05        |
| ROUGE  | 0.20*      | 0.13*      | 0.11*       | 0.09*      | 0.15*      | 0.06        | 0.09*      | 0.15*      | 0.06*       |
| NIST   | 0.21*      | 0.09       | 0.06        | 0.07*      | 0.13*      | 0.06        | 0.10*      | 0.08*      | 0.03        |
| LEPOR  | 0.07       | 0.07       | 0.01        | 0.13*      | 0.15*      | 0.05        | 0.16*      | 0.12*      | 0.04        |
| CIDEF  | 0.21*      | 0.16*      | 0.12*       | 0.10*      | 0.16*      | 0.05        | 0.08*      | 0.12*      | 0.04        |
| METEOR | 0.25*      | 0.13*      | 0.12*       | 0.11*      | 0.15*      | 0.08*       | 0.15*      | 0.18*      | 0.11*       |
| SIM    | 0.15*      | 0.09       | 0.07        | 0.01       | -0.04      | -0.09*      | 0.15*      | -0.02      | -0.02       |
| RE     | -0.08      | 0.03       | 0.09        | 0.01       | 0.04       | 0.10*       | 0.02       | 0.02       | 0.06        |
| cpw    | 0.05       | -0.04      | -0.12*      | 0.07*      | 0.05       | -0.02       | 0.04       | 0.10*      | 0.06        |
| len    | 0.14*      | -0.22*     | -0.24*      | 0.05       | -0.14*     | -0.07*      | 0.16*      | -0.15*     | -0.09*      |
| wps    | 0.14*      | -0.23*     | -0.23*      | 0.03       | -0.14*     | -0.06       | 0.14*      | -0.17*     | -0.10*      |
| sps    | 0.14*      | -0.19*     | -0.21*      | -0.01      | -0.18*     | -0.12*      | 0.10*      | -0.18*     | -0.12*      |
| spw    | 0.05       | 0.00       | -0.06       | -0.10*     | -0.06      | -0.14*      | -0.11*     | -0.02      | -0.07*      |
| pol    | 0.13*      | -0.05      | -0.10*      | -0.04      | -0.10*     | -0.14*      | -0.03      | -0.08*     | -0.08*      |
| ppw    | 0.06       | 0.11*      | 0.04        | -0.06      | -0.04      | -0.13*      | -0.11*     | 0.01       | -0.04       |
| mzp    | 0.02       | -0.04      | -0.11*      | 0.02       | -0.06      | -0.06       | 0.08*      | 0.01       | 0.01        |
| prs    | -0.10      | 0.22*      | 0.25*       | -0.05      | 0.12*      | 0.07        | -0.13*     | 0.18*      | 0.13*       |

Table 10: Spearman correlation between metrics and human ratings for each dataset. “\*” denotes statistically significant correlation ( $p < 0.05$ ).

|        | TGEN       |            |             | LOLS       |            |             | RNNLG      |            |             |
|--------|------------|------------|-------------|------------|------------|-------------|------------|------------|-------------|
|        | <i>inf</i> | <i>nat</i> | <i>qual</i> | <i>inf</i> | <i>nat</i> | <i>qual</i> | <i>inf</i> | <i>nat</i> | <i>qual</i> |
| TER    | -0.21*     | -0.19*     | -0.16*      | -0.07*     | -0.15*     | -0.11*      | -0.02      | -0.13*     | -0.08*      |
| BLEU1  | 0.30*      | 0.15*      | 0.13        | 0.08*      | 0.12*      | 0.08*       | 0.07*      | 0.13*      | 0.07*       |
| BLEU2  | 0.30*      | 0.17*      | 0.14        | 0.05       | 0.11*      | 0.07*       | 0.06*      | 0.14*      | 0.08*       |
| BLEU3  | 0.27*      | 0.17*      | 0.12        | 0.04       | 0.09*      | 0.07*       | 0.06       | 0.13*      | 0.08*       |
| BLEU4  | 0.23*      | 0.15*      | 0.11        | 0.04       | 0.04       | 0.04        | 0.06       | 0.11*      | 0.08*       |
| ROUGE  | 0.20*      | 0.11       | 0.09        | 0.05       | 0.09*      | 0.05        | 0.07*      | 0.15*      | 0.09*       |
| NIST   | 0.25*      | 0.07       | 0.02        | 0.07*      | 0.11*      | 0.09*       | 0.04       | 0.06*      | 0.01        |
| LEPOR  | 0.17*      | 0.12       | 0.07        | 0.13*      | 0.13*      | 0.11*       | 0.02       | 0.05       | 0.00        |
| CIDEF  | 0.26*      | 0.14*      | 0.10        | 0.05       | 0.13*      | 0.09*       | 0.04       | 0.10*      | 0.02        |
| METEOR | 0.29*      | 0.09       | 0.09        | 0.14*      | 0.13*      | 0.12*       | 0.08*      | 0.15*      | 0.10*       |
| SIM    | 0.16*      | 0.04       | 0.06        | 0.14*      | 0.02       | 0.00        | 0.05       | -0.08*     | -0.09*      |
| RE     | -0.06      | 0.09       | 0.13        | -0.02      | 0.04       | 0.07*       | 0.02       | -0.01      | 0.06*       |
| cpw    | 0.03       | -0.12      | -0.19*      | 0.11*      | 0.11*      | 0.08*       | -0.02      | 0.02       | -0.05       |
| len    | 0.25*      | -0.25*     | -0.21*      | 0.17*      | -0.12*     | -0.10*      | 0.06       | -0.18*     | -0.08*      |
| wps    | 0.33*      | -0.17*     | -0.12       | 0.11*      | -0.17*     | -0.13*      | 0.07*      | -0.17*     | -0.06       |
| sps    | 0.25*      | -0.20*     | -0.17*      | 0.09*      | -0.19*     | -0.17*      | 0.03       | -0.17*     | -0.08*      |
| spw    | 0.01       | -0.07      | -0.13       | -0.07*     | -0.06*     | -0.10*      | -0.09*     | 0.01       | -0.07*      |
| pol    | 0.16*      | -0.06      | -0.07       | -0.02      | -0.09*     | -0.11*      | -0.08*     | -0.08*     | -0.09*      |
| ppw    | -0.02      | 0.06       | 0.00        | -0.08*     | 0.00       | -0.05       | -0.11*     | 0.00       | -0.07*      |
| mzp    | -0.02      | -0.06      | -0.11       | 0.10*      | 0.00       | 0.02        | 0.02       | -0.04      | -0.07*      |
| prs    | -0.23*     | 0.18*      | 0.13        | -0.12*     | 0.16*      | 0.15*       | -0.07*     | 0.14*      | 0.10*       |

Table 11: Spearman correlation between metrics and human ratings for each system. “\*” denotes statistical significance ( $p < 0.05$ ).

| Accuracy       | rand  | TER    | BLEU1  | BLEU2  | BLEU3  | BLEU4  | ROUGE  | NIST   | LEPOR  | CIDEF  | METE   | RE     | SIM    |
|----------------|-------|--------|--------|--------|--------|--------|--------|--------|--------|--------|--------|--------|--------|
| BAGEL          |       |        |        |        |        |        |        |        |        |        |        |        |        |
|                | 37.13 | 45.05* | 41.58* | 41.58* | 42.57* | 42.08* | 43.07* | 43.07* | 41.58* | 43.07* | 45.54* | 37.13  | 41.09* |
|                | 42.08 | 47.03* | 46.04* | 45.54* | 44.06* | 45.05* | 46.04* | 44.55* | 46.53* | 45.05* | 45.05* | 42.08  | 43.07* |
| SFHOTEL        | 33.17 | 45.54* | 43.07* | 40.10* | 40.59* | 43.56* | 43.07* | 41.09* | 40.59* | 42.08* | 41.58* | 37.62  | 42.57* |
|                | 25.38 | 34.92* | 35.68* | 35.18* | 35.68* | 34.67* | 36.43* | 31.41  | 32.16* | 33.92* | 36.43* | 34.92* | 33.92* |
|                | 41.96 | 45.73  | 46.48  | 45.48  | 46.48  | 45.23  | 48.74  | 41.21  | 43.72  | 44.72  | 49.75* | 37.19  | 46.98  |
| SFREST         | 44.47 | 40.95  | 40.95  | 42.21  | 44.72  | 41.46  | 43.22  | 40.2   | 40.95  | 42.46  | 45.98  | 33.67  | 37.44  |
|                | 33.68 | 36.27  | 35.41  | 34.02  | 34.72  | 36.96  | 33.16  | 35.58  | 36.27  | 32.47  | 34.72  | 38.34* | 42.66* |
|                | 36.10 | 40.41  | 40.07  | 38.86  | 38.34  | 38.86  | 38.17  | 39.38  | 41.11* | 36.79  | 39.38  | 39.38  | 38.00  |
| SFREST, quant. | 39.38 | 37.13  | 36.96  | 39.21  | 37.65  | 39.55  | 36.10  | 38.69  | 39.72  | 35.23  | 34.89  | 40.93  | 37.31  |
|                | 31.95 | 35.75* | 36.27* | 34.37* | 35.92* | 34.54* | 36.44* | 39.55* | 37.13* | 36.27* | 36.79* | 38.17* | 42.83* |
|                | 39.21 | 33.33  | 34.37  | 32.3   | 30.57  | 26.94  | 34.54  | 33.16  | 35.92  | 30.92  | 31.61  | 32.47  | 35.41  |
| naturalness    | 37.13 | 37.82  | 38.69  | 36.1   | 35.75  | 32.3   | 36.96  | 39.21  | 38.86  | 35.23  | 38.34  | 34.2   | 36.1   |

Table 12: Accuracy of metrics predicting relative human ratings, with “\*” denoting statistical significance ( $p < 0.05$ ).

|        | <i>informativeness</i> |                     | <i>naturalness</i> |                     | <i>quality</i> |                     |
|--------|------------------------|---------------------|--------------------|---------------------|----------------|---------------------|
|        | <i>Bad</i>             | <i>Good and avg</i> | <i>Bad</i>         | <i>Good and avg</i> | <i>Bad</i>     | <i>Good and avg</i> |
| TER    | <b>0.48*</b>           | 0.07*               | <b>0.31*</b>       | 0.15*               | 0.08           | 0.06*               |
| BLEU1  | <b>0.45*</b>           | 0.11*               | <b>0.26*</b>       | 0.13*               | 0.07           | 0.04                |
| BLEU2  | <b>0.49*</b>           | 0.09*               | <b>0.29*</b>       | 0.13*               | 0.05           | 0.04*               |
| BLEU3  | <b>0.40*</b>           | 0.08*               | <b>0.25*</b>       | 0.13*               | 0.01           | 0.05*               |
| BLEU4  | <b>0.41*</b>           | 0.07*               | <b>0.21*</b>       | 0.08*               | 0.01           | 0.04                |
| ROUGE  | <b>0.50*</b>           | 0.08*               | <b>0.28*</b>       | 0.13*               | 0.07           | 0.04*               |
| NIST   | <b>0.26</b>            | 0.08*               | <b>0.23*</b>       | 0.08*               | 0.08           | 0.03                |
| LEPOR  | <b>0.40*</b>           | 0.09*               | <b>0.23*</b>       | 0.10*               | 0.03           | 0.01                |
| CIDEF  | <b>0.42*</b>           | 0.09*               | <b>0.21*</b>       | 0.12*               | 0.02           | 0.04                |
| METEOR | <b>0.45*</b>           | 0.14*               | 0.24*              | 0.15*               | 0.03           | 0.08*               |
| SIM    | <b>0.37*</b>           | 0.12*               | <b>0.29*</b>       | -0.03               | <b>0.21*</b>   | -0.08*              |

Table 13: Spearman correlation between WBM scores and human ratings for utterances from the *Bad* bin and utterances from the *Good* and *Average* bins. “\*” denotes statistically significant correlation ( $p < 0.05$ ), bold font denotes significantly stronger correlation for the *Bad* bin compared to the *Good* and *Average* bins.

|        | <i>informativeness</i> |                   | <i>naturalness</i> |                   | <i>quality</i> |                   |
|--------|------------------------|-------------------|--------------------|-------------------|----------------|-------------------|
|        | <i>Inform</i>          | <i>Not inform</i> | <i>Inform</i>      | <i>Not inform</i> | <i>Inform</i>  | <i>Not inform</i> |
| TER    | -0.08*                 | -0.10             | -0.17*             | -0.18*            | -0.09*         | -0.11*            |
| BLEU1  | 0.11*                  | 0.09              | 0.14*              | 0.20*             | 0.07*          | 0.11*             |
| BLEU2  | 0.09*                  | 0.10              | 0.14*              | 0.20*             | 0.07*          | 0.13*             |
| BLEU3  | 0.07*                  | 0.11*             | 0.13*              | 0.20*             | 0.06*          | 0.14*             |
| BLEU4  | 0.06*                  | 0.11*             | 0.09*              | 0.18*             | 0.05*          | 0.14*             |
| ROUGE  | 0.08*                  | 0.12*             | 0.14*              | 0.22*             | 0.06*          | 0.16*             |
| NIST   | 0.08*                  | 0.05              | 0.10*              | 0.06              | 0.07*          | -0.06             |
| LEPOR  | 0.09*                  | 0.16*             | 0.11*              | 0.16*             | 0.05*          | 0.04              |
| CIDEF  | 0.10*                  | 0.01              | <b>0.16*</b>       | 0.04              | <b>0.07*</b>   | 0.02              |
| METEOR | 0.14*                  | 0.17*             | 0.15*              | 0.22*             | 0.09*          | 0.18*             |
| SIM    | 0.15*                  | 0.09              | -0.01              | -0.03             | -0.05*         | -0.10             |
| cpw    | <b>0.12*</b>           | -0.15*            | <b>0.09*</b>       | -0.14*            | <b>0.01</b>    | -0.11*            |
| len    | 0.17*                  | 0.08              | -0.15*             | -0.12*            | -0.12*         | -0.05             |
| wps    | 0.11*                  | 0.19*             | <b>-0.19*</b>      | -0.03             | <b>-0.12*</b>  | 0.01              |
| sps    | 0.09*                  | 0.18*             | <b>-0.20*</b>      | -0.02             | <b>-0.17*</b>  | 0.02              |
| spw    | -0.06*                 | 0.09              | -0.03              | 0.01              | <b>-0.12*</b>  | 0.01              |
| pol    | <b>-0.08*</b>          | 0.05              | -0.10*             | -0.03             | -0.09*         | -0.03             |
| ppw    | <b>-0.14*</b>          | -0.01             | 0.00               | -0.03             | -0.03          | -0.05             |
| mzp    | <b>0.11*</b>           | -0.03             | 0.00               | -0.08             | -0.03          | -0.08             |
| prs    | -0.10*                 | -0.18*            | <b>0.18*</b>       | 0.04              | <b>0.15*</b>   | 0.02              |

Table 14: Spearman correlation between automatic metrics and human ratings for utterances of the *inform* MR type and utterances of other MR types. “\*” denotes statistically significant correlation ( $p < 0.05$ ), bold font denotes significantly stronger (absolute) correlation for *inform* MRs compared to non-*inform* MRs.
